# Supplementary material for: Air promotes efficient and selective CO 2 photoreduction with a molecule/semiconductor hybrid photocatalyst: the significant role of simultaneous photodegradation of organic pollutants
Source: Royal Society of Chemistry journal article supplement (doi:10.1039/d4qi01739k), 2024-01-01
Supplement: d4qi01739k1.pdf [file d4qi01739k1.pdf]

### Supporting Information

#### **Air promotes efficient and selective CO<sub>2</sub> photoreduction with a molecule/semiconductor hybrid photocatalyst: the significant role of simultaneous photodegradation of organic pollutant**

Xinyue Hong, Yuru Zhu and Duobin Chao\*

School of Materials Science and Chemical Engineering, Ningbo University, Ningbo, Zhejiang  
315211, China.

## 1 Experimental Section

### 1.1 Materials and characterization

Tetracycline Hydrochloride was purchased from energy chemical. All of the reagents were used without further purification. X-ray photoelectron spectroscopy (XPS) was performed on the Thermo Scientific ESCALAB Xi+, with the Al-K $\alpha$  ( $h\nu=1486.6$  eV) radiation to analyze the binding energy of the elements contained in the samples. All peaks were calibrated to the C 1s peak at 284.8 eV. X-ray diffraction (XRD) patterns of samples were obtained by D8 Advance with the Cu-K $\alpha$  radiation. Scanning electron microscope (SEM) and Energy dispersive spectrum (EDS) mapping were performed on ZEISS Sigma 300 to characterize the morphological characteristics and elemental components of the samples. Brunauer–Emmett–Teller (BET) technique were conducted on Micromeritics ASAP 2460 surface area analyzer to detect the N<sub>2</sub> adsorption–desorption isotherms, pore size distribution and surface area of the samples. Fourier transform infrared (FT–IR) spectra were collected on Nicolet 670 FT–IR spectroscopy to confirm the chemical compositions of the samples. UV–visible diffuse–reflection spectrometry (UV–vis–DRS) spectra were recorded on Shimadzu UV–3600i Plus to further obtain the band gap energy of the samples. Shimadzu GC2014 equipped with a TCD and FID detector was used to analyze the gas products while the liquid products were detected by <sup>1</sup>H–NMR spectra on Bruker Ascend 500 MHz. The UV–visible absorption spectra were collected on G9 spectrophotometer to receive the absorbance of reacted solution. Photoelectrochemical measurements were performed on the electrochemical workstation (CHI–660E), using a three–electrode system. In–situ diffuse reflectance infrared Fourier transform spectra (In–situ DRIFTS) were recorded on Bruker INVENIO–S equipped with a MCT detector. The fluorescence spectra were confirmed by Shimadzu RF–6000 fluorescence spectrometer at the excitation wavelength of 375 nm with 5.0 nm excitation and emission light bandwidths. Time–resolved emission decay spectra were recorded by Edinburgh FLS1000. The electron paramagnetic resonance (EPR) experiments were performed on Bruker EMXplus–6/1. Inductively coupled plasma–Mass Spectrometry (ICP–MS) was conducted on Agilent 7800(MS). High–Resolution Mass Spectrometry (HR–MS) was performed on Shimadzu LCMS–IT–TOF.

### 1.2 Synthesis of NitpyCN

The pristine carbon nitride (CN) and 4'–(4–bromophenyl)–2,2':6',2''–terpyridine were synthesized following the literatures.<sup>1,2</sup> The NitpyCN was synthesized as follows. Firstly, 4'–(4–bromophenyl)–2,2':6',2''–terpyridine (100 mg) was dissolved in the dichloromethane (30 mL) solution. Then, CN (1 g) was added to the solution. After the mixture was stirred for 4h, the solvent was removed at reduced pressure. The remained solid was dried in a vacuum drying cabinet for 10 h. Then, the solid was calcined under N<sub>2</sub> at 300°C for 4h. After calcination, the obtained solid was washed with dichloromethane to afford a product named as tpyCN. Next, tpyCN was dried in the vacuum for 10 h. Next, acetonitrile solution (40 mL) containing tpyCN (100 mg) and methyl alcohol (10 mL) solution containing NiCl<sub>2</sub>·6H<sub>2</sub>O (8.38 mg) were mixed under N<sub>2</sub>. The mixed solution was stirred at 80°C for 12h. The reaction suspension was then filtered and washed with methyl alcohol to afford NitpyCN.

### 1.3 Photocatalytic CO<sub>2</sub> reduction

Photocatalytic CO<sub>2</sub> reduction experiments were generally carried out in a glass tube with a volume of 45 mL. For photocatalytic CO<sub>2</sub> reduction experiments under high–purity CO<sub>2</sub> (99.999%), the catalyst (NitpyCN or CN), TEA (0.07 M) and DMA/H<sub>2</sub>O (10 mL) solution were added to the

tube. After excluding air from the catalytic system with Ar for 15 min and subsequent high-purity CO<sub>2</sub> for 15 min, the tube was sealed with a rubber plug immediately. The reaction system was kept at room temperature with the white LED equipment (3STECH,  $\lambda \geq 420$  nm) as the light source. The obtained gaseous products were analyzed by Shimadzu GC2014 equipped with a TCD and FID detector, while liquid products such as HCOOH were determined by <sup>1</sup>H NMR.

In photocatalytic CO<sub>2</sub> reduction in the presence of air, the hybrid photocatalyst NitpyCN, the antibiotic TC and 10 mL H<sub>2</sub>O were added to the tube. The reaction suspension was first bubbled with Ar for 15 min. Subsequently, the reaction suspension was bubbled with mixed CO<sub>2</sub>/air gases at a certain content of air for 15 min. Then, the tube was sealed with a rubber plug immediately. In order to achieve the adsorption-desorption equilibrium of the catalytic system, the tube was stirred in dark for 15 min before light irradiation. After that, the reaction system was kept at room temperature with the white LED equipment (3STECH,  $\lambda \geq 420$  nm, 7 W) as the light source. The obtained gaseous products were analyzed by Shimadzu GC-2014 equipped with a TCD and FID detector, while the degradation efficiency of TC was determined by UV-vis absorption spectroscopy. According to Lambert-Beer law,  $1-c/c_0=1-A/A_0$ . Therefore, the degradation efficiency of TC is calculated by the equation of  $(1-A/A_0)*100\%$ . Note:  $c_0$  and  $c$  are the concentrations of TC in the reaction solution before and after photocatalysis, respectively.  $A_0$  and  $A$  are the initial absorbance of TC at 357 nm in the reaction solution before and after photocatalysis, respectively.

#### 1.4 Photoelectrochemical measurements

All photoelectrochemical measurements were conducted on the electrochemical workstation (CHI-660E) with Ag/AgCl as the reference electrode, platinum as the counter electrode, and FTO glass or carbon paper loaded with samples (CN or NitpyCN) as the working electrode.

The preparation of the FTO and carbon paper working electrodes was conducted as follows. For the FTO working electrodes, a mixture consisting of 5 mg of the sample (NitpyCN or CN) and 20  $\mu$ L of Nafion was initially dissolved in 2 mL of ethanol. To ensure uniform dispersion of the samples, the mixture underwent sonication for 20 minutes, resulting in the formation of an ink. Following this, 200  $\mu$ L of the ink was precisely dispensed onto the conductive side of the FTO glass (dimensions: 6 mm  $\times$  10 mm). The FTO glass was then allowed to dry naturally. In the case of carbon paper working electrodes, 4 mg of the sample (NitpyCN or CN) and 75  $\mu$ L of Nafion were mixed in 2 mL of ethanol. After sonication, the resulting ink was ready for application. Next, 400  $\mu$ L of the ink was applied to the conductive side of the carbon paper (dimensions: 8 mm  $\times$  10 mm). The carbon paper was left to dry naturally in the air.

Mott-Schottky plots (M-S), Electrochemical impedance spectrum (EIS), and photocurrent responses were implemented with FTO working electrode in a three-electrode cell, using 0.5 M Na<sub>2</sub>SO<sub>4</sub> as the electrolyte. In addition, the photocurrent responses were measured with the LED equipment used for photocatalytic experiments. The run time was 200 s with an interval of 20 s. The values of CB and VB were calculated as follows. According to the results of M-S, the flat band potentials ( $E_{fb}$ ) of CN and NitpyCN were determined to be -1.15 and -1.20 V vs. SCE, which were equivalent to be -0.91 and -0.96 V vs. NHE ( $E_{NHE}=E_{SCE} + 0.24$  V), respectively. Because CN and NitpyCN were n-type semiconductors, the value of  $E_{fb}$  was basically equal to the Fermi energy level ( $E_f$ ).<sup>3</sup> On the basis of VB-XPS results, the energy level difference ( $E_{vf}$ ) between  $E_f$  and VB of CN and NitpyCN were determined to be 2.35 and 2.20 eV, respectively. Therefore, the values of VB for CN and NitpyCN were calculated to be 2.35 and 2.20 V vs. NHE, respectively. Based on the Tauc plots, the  $E_g$  of CN and NitpyCN were ascertained to be 2.75 and 2.70 V vs. NHE, respectively.

Thus, the values of CB for CN and NitpyCN were calculated to be  $-1.31$  and  $-1.46$  V vs. NHE.

Linear sweep voltammetry (LSV) curves and Cyclic voltammetry (CV) curves were implemented with carbon paper working electrodes in H-type electrolytic cell, using  $0.5$  M  $\text{KHCO}_3$  as the electrolyte. The potentials vs Ag/AgCl are transformed to values vs RHE.  $E_{\text{RHE}} = 0.197 \text{ V} + E_{\text{Ag/AgCl}} + 0.0591 \text{ V} * \text{pH}$ .

### 1.5 In-situ DRIFTS measurements

At the commencement of the measurements, the sample underwent a 30-minute purge with  $\text{N}_2$  to eliminate any gases adsorbed on its surface. Following this,  $\text{CO}_2$  and water vapor were introduced into the reactor while ensuring dark conditions. Subsequently, after a duration of 30 minutes, initial spectrum was recorded in the absence of light. Ultimately, the reactor was exposed to irradiation from a 300 W Xe lamp, and spectra were systematically recorded at 5-minute intervals for 30 minutes.

### 1.6 EPR measurements

The samples for EPR measurements were pretreated as follows. NitpyCN (10.0 mg) was added into TC (0.5 mM) solution. After sonication for 10 min,  $30 \mu\text{L}$  of the solution mixed with DMPO solution ( $30.0 \mu\text{L}$ ). Next, the mixed solution was sucked up with a capillary tube. The capillary tube was put in a quartz tube. Finally, the quartz tube was put into the Bruker EMXplus-6/1 for trapping  $\text{OH}^\cdot$  and  $\text{O}_2^{\cdot-}$ . The EPR spectra were recorded in the dark and then under light irradiation for 3 min with a 300 W Xe lamp. Solvents used for  $\text{OH}^\cdot$  and  $\text{O}_2^{\cdot-}$  measurements were different. For  $\text{OH}^\cdot$  trapping experiment, the solvent was  $\text{H}_2\text{O}$ . For  $\text{O}_2^{\cdot-}$  trapping experiment, the solvent was  $\text{CH}_3\text{OH}$ .

## 2 Supplementary Fig.s and Tables

**Table S1.** Binding energy values of C, O, N, Cl, and Ni atoms for CN and NitpyCN.

| Photocatalyst | C 1s BE (eV)<br>(%) |                   |                | N 1s BE (eV)<br>(%) |                 |                    |                 | O 1s<br>BE<br>(eV) | Cl 2p BE (eV)<br>(%)    |                         | Ni 2p BE (eV)<br>(%)        |                                          |                                          |                                          |                                          |
|---------------|---------------------|-------------------|----------------|---------------------|-----------------|--------------------|-----------------|--------------------|-------------------------|-------------------------|-----------------------------|------------------------------------------|------------------------------------------|------------------------------------------|------------------------------------------|
|               | N-C=C               | C-NH <sub>x</sub> | C-C<br>/C=C    | π-<br>excitation    | NH <sub>x</sub> | N-(C) <sub>3</sub> | C-N=C           |                    | Cl<br>2p <sub>1/2</sub> | Cl<br>2p <sub>3/2</sub> | Ni(II)<br>2p <sub>1/2</sub> | Ni(II)<br>2p <sub>1/2</sub><br>Satellite |                                          | Ni(II)<br>2p <sub>3/2</sub><br>Satellite |                                          |
|               |                     |                   |                |                     |                 |                    |                 |                    |                         |                         |                             | Ni(II)<br>2p <sub>3/2</sub>              | Ni(II)<br>2p <sub>3/2</sub><br>Satellite | Ni(II)<br>2p <sub>3/2</sub>              | Ni(II)<br>2p <sub>3/2</sub><br>Satellite |
| CN            | 288.4<br>(87.0)     | 286.5<br>(3.5)    | 284.5<br>(9.6) | 404.2<br>(1.5)      | 401.2<br>(4.6)  | 400.3<br>(16.9)    | 398.7<br>(76.9) | 532.8              | -                       | -                       | -                           | -                                        | -                                        | -                                        | -                                        |
| NitpyCN       | 288.8<br>(85.1)     | 285.7<br>(5.2)    | 284.5<br>(9.7) | 404.1<br>(5.2)      | 401.1<br>(5.4)  | 399.9<br>(16.7)    | 398.3<br>(72.7) | 531.8              | 198.8<br>(25.4)         | 197.1<br>(74.6)         | 872.9<br>(22.9)             | 879.1<br>(11.9)                          | 855.5<br>(42.4)                          | 860.9<br>(22.8)                          |                                          |

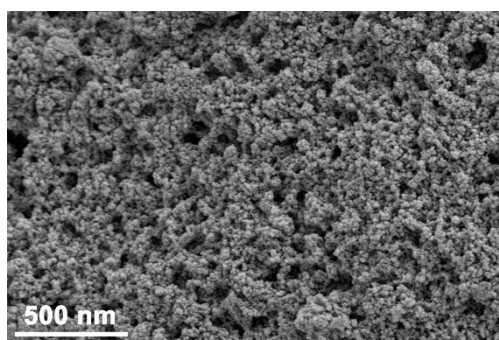

**Fig. S1** SEM image of the hybrid photocatalyst NitpyCN.

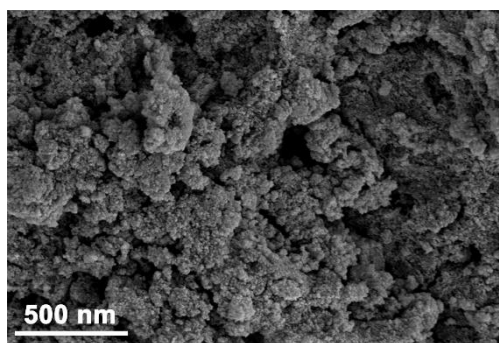

**Fig. S2** SEM image of pristine CN.

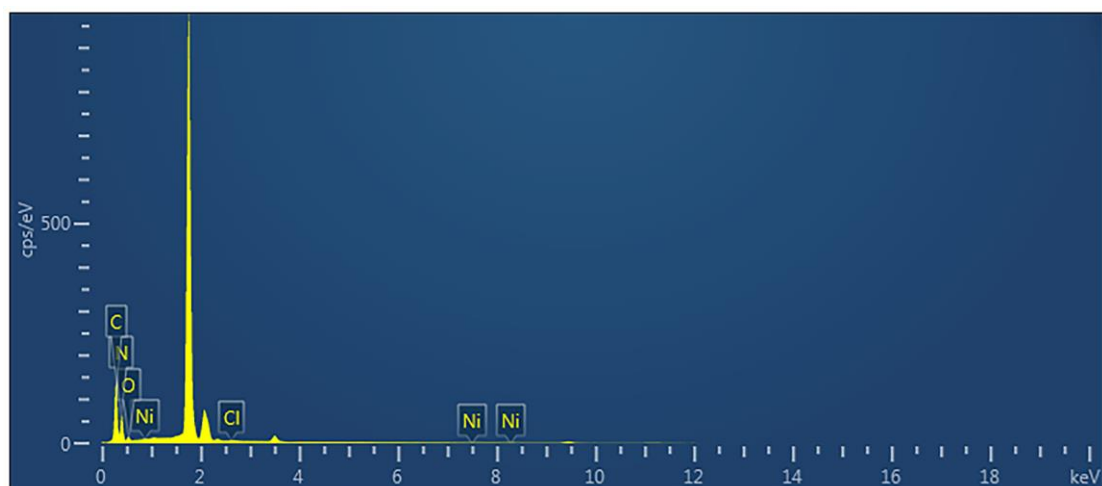

**Fig. S3** The SEM-EDS plots of NitpyCN.

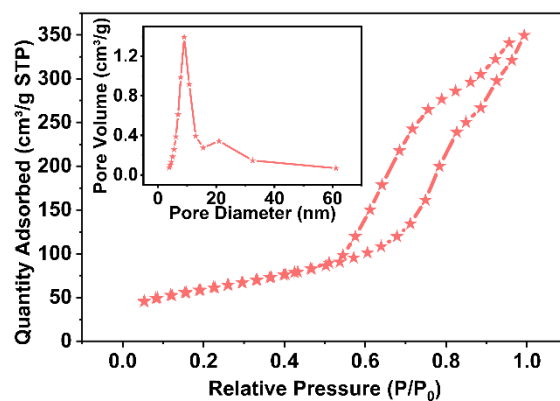

**Fig. S4** N<sub>2</sub> adsorption–desorption isotherms of pristine CN.

**Table S2.** The BET surface area, pore volume, and pore size of NitpyCN and CN.

|         | BET Surface Area (m <sup>2</sup> g <sup>-1</sup> ) | Pore Volume (cm <sup>3</sup> g <sup>-1</sup> ) | Pore Size (nm) |
|---------|----------------------------------------------------|------------------------------------------------|----------------|
| NitpyCN | 203.3                                              | 0.4                                            | 8.5            |
| CN      | 213.3                                              | 0.5                                            | 9.1            |

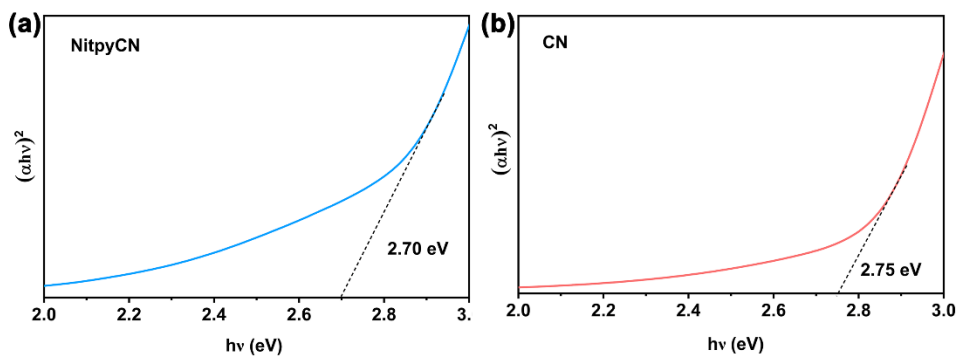

**Fig. S5** Tauc plots of (a) NitpyCN and (b) CN.

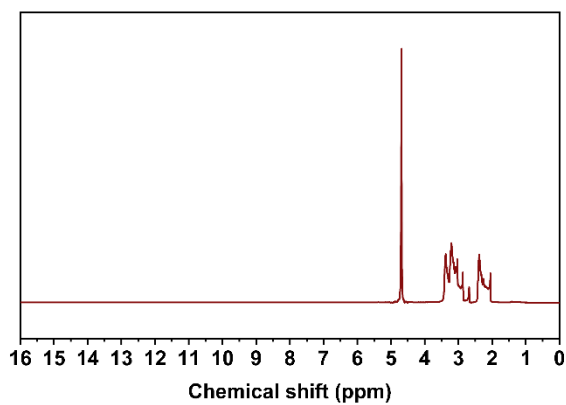

**Fig. S6**  $^1\text{H}$  NMR spectrum of photocatalytic reaction solution (400  $\mu\text{L}$ ) of LutpyCN by adding  $\text{D}_2\text{O}$  (100  $\mu\text{L}$ ) and DMSO (2.0 mg) as the internal standard.

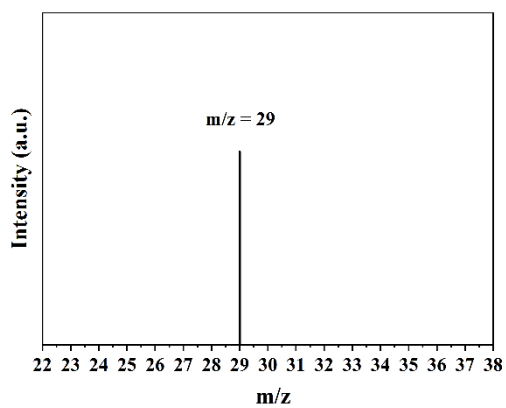

**Fig. S7** The MS spectrum of isotopic labelling experiment with  $^{13}\text{CO}_2$  for NitpyCN.

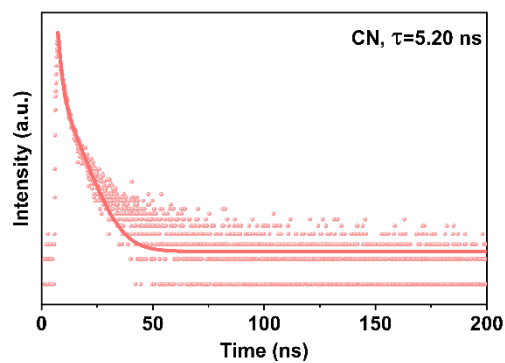

Fig. S8 Time-resolved photoluminescence spectrum of CN.

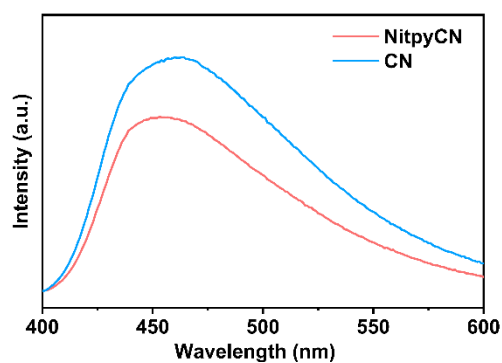

Fig. S9 PL spectra of CN and NitpyCN.

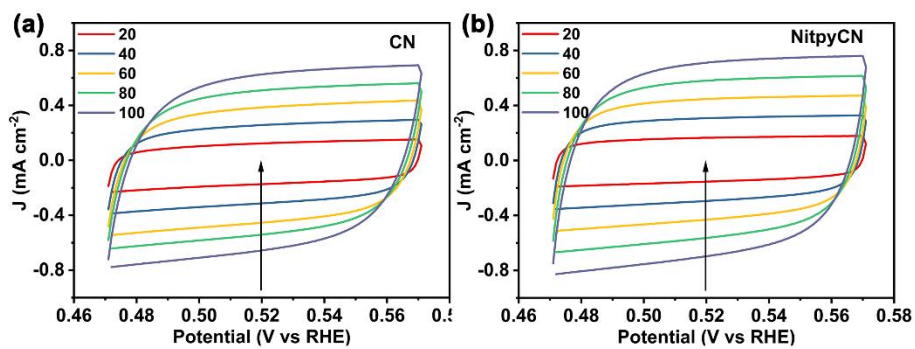

Fig. S10 CV curves at different scan rates (20, 40, 60, 80 and 100  $\text{mV s}^{-1}$ ) of (a) CN and (b) NitpyCN.

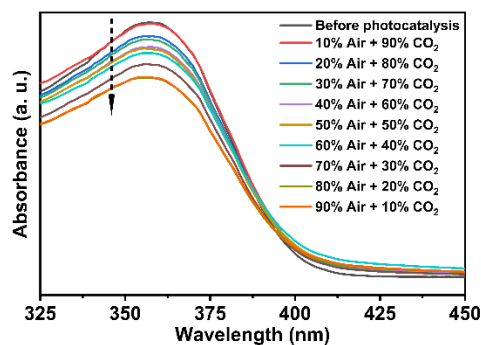

**Fig. S11** The UV–visible absorption spectra of the reaction solution after photocatalysis at different volume ratios of  $\text{CO}_2/\text{air}$ .

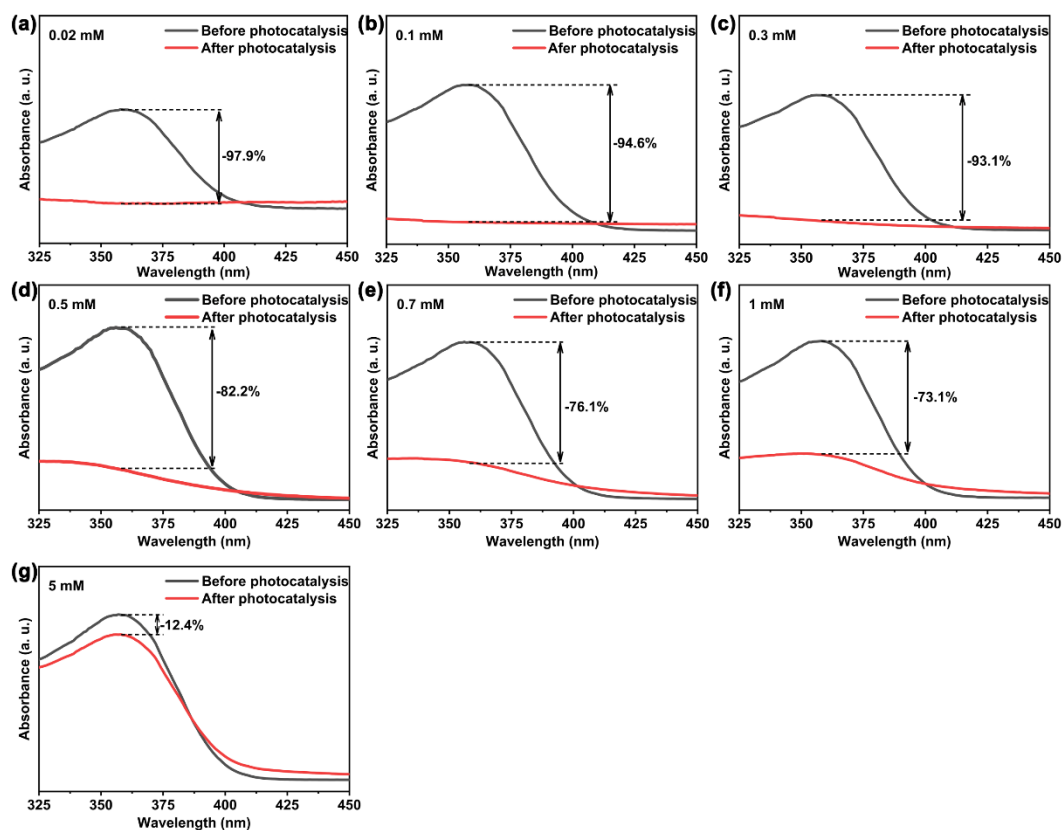

**Fig. S12** The UV–visible absorption spectra of the reaction solution after photocatalysis with different concentration of TC (a) 0.02 mM (b) 0.1 mM (c) 0.3 mM (d) 0.5 mM (e) 0.7 mM (f) 1.0 mM (g) 5.0 mM.



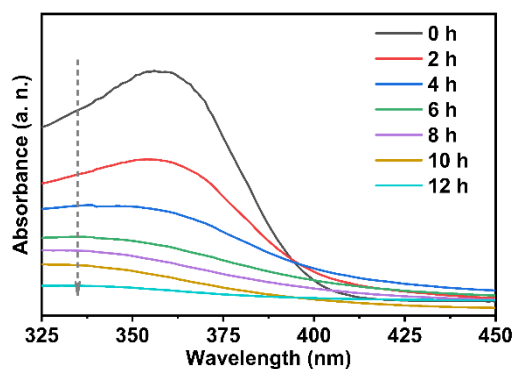

**Fig. S13** UV–visible absorption spectra of the reaction solution after photocatalysis with different irradiation time.

**Table S3.** Comparison with recent photocatalysts for CO<sub>2</sub> photoreduction with simultaneous photodegradation of organic pollutants.

| Entry        | Catalysts                                                 | Atmosphere                                           | Pollutants                              | Solvent                            | Products (μmol g <sup>-1</sup> ) |       | Degradation efficiency | Reference                                   |
|--------------|-----------------------------------------------------------|------------------------------------------------------|-----------------------------------------|------------------------------------|----------------------------------|-------|------------------------|---------------------------------------------|
| 1            | 5%GQDs/<br>V-TiO <sub>2</sub>                             | Ar                                                   | 0.025 mM<br>Methylene blue              | 0.01 M NaOH<br>aqueous<br>solution | CH <sub>3</sub> OH               | 105.9 | 99%                    | ACS<br>Catal.<br>2016, 6, 10,<br>6861–6867  |
|              |                                                           |                                                      |                                         |                                    | C <sub>2</sub> H <sub>5</sub> OH | 45.2  |                        |                                             |
|              |                                                           |                                                      |                                         |                                    | CH <sub>4</sub>                  | 3.6   |                        |                                             |
| 2            | 1%rGO/SrTi<br>0.95Fe <sub>0.05</sub> O <sub>3-δ</sub>     | Ar                                                   | 0.01 mM<br>Rhodamine B                  | 0.02 M NaOH<br>aqueous<br>solution | CH <sub>3</sub> OH               | 86.1  | 90%                    | J. Catal.<br>2017, 349,<br>218–225          |
|              |                                                           |                                                      |                                         |                                    | C <sub>2</sub> H <sub>5</sub> OH | 49.1  |                        |                                             |
| 3            | Co-BiOBr                                                  | high-purity<br>CO <sub>2</sub> gas<br>(≥99.999%)     | 1.35 mM<br>Tetracycline                 | Deionized water                    | CO                               | 21    | 92%                    | J. Alloys<br>Compd.<br>2024, 970,<br>172663 |
| 4            | CuInZnS-<br>Ti <sub>3</sub> C <sub>2</sub> T <sub>x</sub> | high-purity<br>CO <sub>2</sub> gas<br>(≥99.999%)     | 0.45 mM<br>Tetracycline                 | Deionized water                    | CO                               | 102   | 98.5%                  | Nano Res.<br>2022,15,<br>800-8018           |
| This<br>work | NitpyCN                                                   | 40% CO <sub>2</sub> and<br>60% air<br>(Volume ratio) | 0.5 mM<br>Tetracycline<br>Hydrochloride | Deionized water                    | CO                               | 623.3 | 94.9%                  |                                             |

**Table S4** Comparison with various metal complexes/carbon nitride photocatalysts for CO<sub>2</sub> to CO in CO<sub>2</sub> photoreduction. TON = n(product)/n(catalyst)

| Entry        | Catalysts                                                                    | Other substance in the photocatalytic system                                                       | Atmosphere                                        | TON | References                                       |
|--------------|------------------------------------------------------------------------------|----------------------------------------------------------------------------------------------------|---------------------------------------------------|-----|--------------------------------------------------|
| 1            | Coqpy@<br>mpg-C <sub>3</sub> N <sub>4</sub>                                  | 0.03 M BIH, 0.03 M PhOH,<br>and CH <sub>3</sub> CN                                                 | high-purityCO <sub>2</sub><br>gas (299.999%)      | 128 | J. Am. Chem.<br>Soc. 2020, 142,<br>13, 6188–6195 |
| 2            | Fe(qpy)<br>/C <sub>3</sub> N <sub>4</sub>                                    | CH <sub>3</sub> CN/TEOA (4:1, v/v)                                                                 | high-purityCO <sub>2</sub><br>gas (299.999%)      | 155 | J. Am. Chem.<br>Soc. 2018, 140,<br>24, 7437–7440 |
| 3            | Cotpy@<br>mpg-C <sub>3</sub> N <sub>4</sub>                                  | DMF/TEOA (v/v, 4:1)                                                                                | high-purityCO <sub>2</sub><br>gas (299.999%)      | 32  | J. CO <sub>2</sub> Util. 2022,<br>62, 102083     |
| 4            | g-C <sub>3</sub> N <sub>4</sub> /[Co<br>(dmbpy) <sub>3</sub> ] <sup>2+</sup> | ultrapure water, [Ru(bpy) <sub>3</sub> ] <sup>2+</sup> ,<br>and CH <sub>3</sub> CN/TEOA (5:1, v:v) | high-purityCO <sub>2</sub><br>gas (299.999%)      | 361 | ACS Catal. 2023,<br>13, 11376–11388              |
| This<br>work | NitpyCN                                                                      | 0.5 mM Tetracycline<br>Hydrochloride in water                                                      | 40% CO <sub>2</sub> and 60%<br>air (Volume ratio) | 9.6 |                                                  |

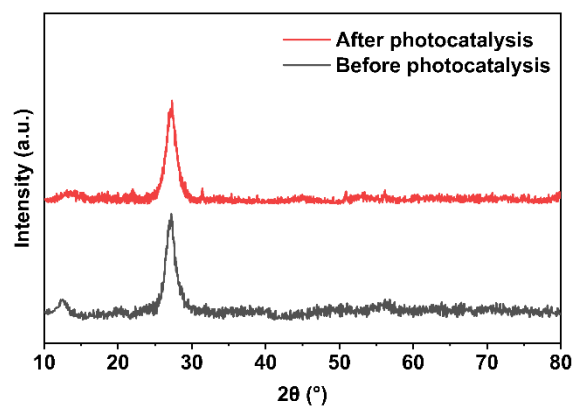

Fig. S14 XRD patterns of NitpyCN before and after photocatalysis.

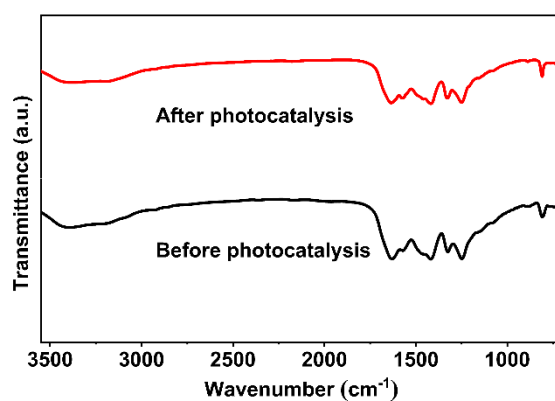

Fig. S15 FT-IR spectra of NitpyCN before and after photocatalysis.

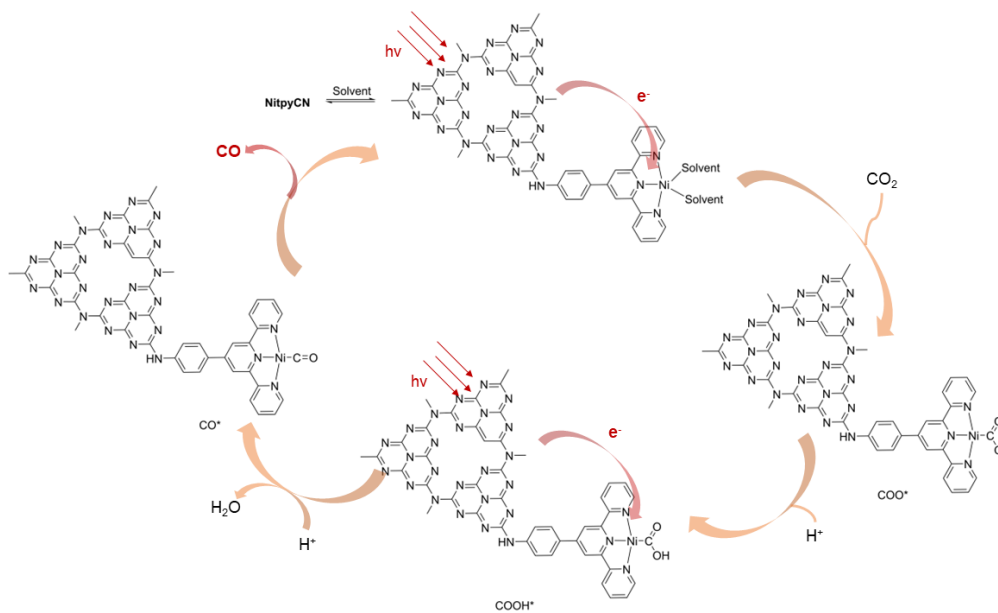

Fig. S16 Probable reaction pathway for CO<sub>2</sub> photoreduction using NitpyCN.

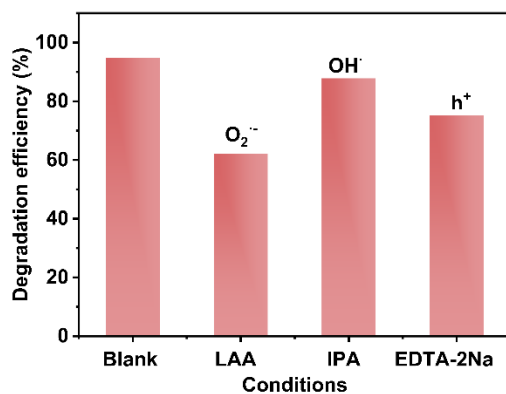

**Fig. S17** The degradation efficiency of TC in the presence of various scavengers for active species. Blank: 10.0 mg NitpyCN and 0.5 mM TC under mixed CO<sub>2</sub>/air (60% air and 40% CO<sub>2</sub>).

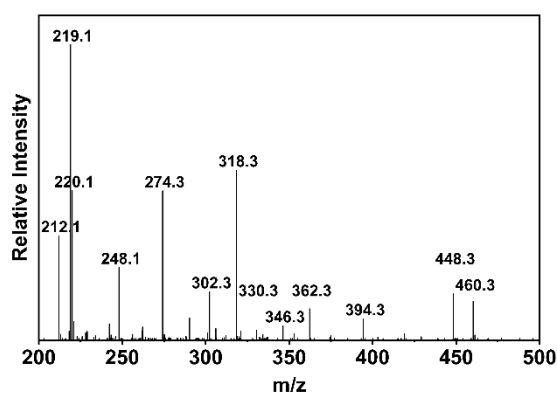

**Fig. S18** HRMS of the reaction solution after photocatalysis. Conditions: TC (0.5 mM), NitpyCN (10.0 mg), light irradiation for 12 h, and water (10.0 mL) under mixed CO<sub>2</sub>/air (60% air and 40% CO<sub>2</sub>).

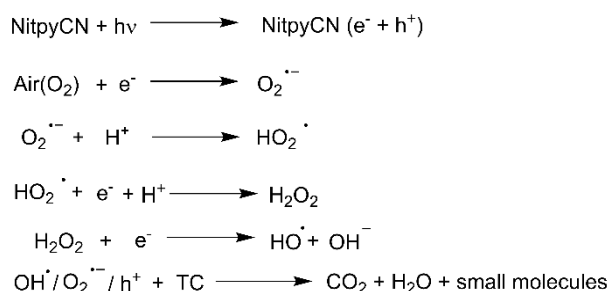

**Fig. S19** Probable reactive species for photodegradation of TC.

## References

1. M. Groenewolt and M. Antonietti, Synthesis of g-C<sub>3</sub>N<sub>4</sub> Nanoparticles in Mesoporous Silica Host Matrices, *Advanced Materials*, 2005, **17**, 1789-1792.
2. J. Wang and G. S. Hanan, A Facile Route to Sterically Hindered and Non-Hindered 4'-Aryl-2,2':6',2''-Terpyridines, *Synlett*, 2005, **2005**, 1251-1254.
3. Y. Bai, L. Ye, L. Wang, X. Shi, P. Wang, W. Bai and P. K. Wong, g-C<sub>3</sub>N<sub>4</sub>/Bi<sub>4</sub>O<sub>5</sub>I<sub>2</sub> heterojunction with I<sub>3</sub><sup>-</sup>/I<sup>-</sup> redox mediator for enhanced photocatalytic CO<sub>2</sub> conversion, *Applied Catalysis B: Environmental*, 2016, **194**, 98-104.
